# Supplementary material for: Mutagenesis Screen Identifies agtpbp1 and eps15L1 as Essential for T lymphocyte Development in Zebrafish
Source: PubMed Central journal article supplement (PMC4498767; doi:10.1371/journal.pone.0131908), 2015-07-10
Supplement: pone.0131908.s016.pdf [file pone.0131908.s016.pdf]

Supplementary S3 Table. Summary of WISH analysis in mutants from the indicated lines

| Line*                                | 42 hpf <i>cmyb</i> | 48 hpf <i>mpx</i> | 48 hpf <i>hbae1</i> | d7 <i>mpx</i>                    | d7 <i>hbae1</i> | d4-7 <i>lck</i>           |
|--------------------------------------|--------------------|-------------------|---------------------|----------------------------------|-----------------|---------------------------|
| <i>Tg(GBT-B4)fcc24</i>               | normal             | normal            | normal              | normal                           | normal          | normal                    |
| <i>vps4b<sup>fcc88-P1Gt</sup></i>    | normal             | normal            | normal              | n.d., lethal between day 3 and 4 | n.d.            | n.d.                      |
| <i>Tg(GBT-B4)fcc143</i>              | normal             | normal            | normal              | normal                           | normal          | decreased on d4, 5 and 6  |
| <i>agtpbp1<sup>fcc301Gt</sup></i>    | normal             | normal            | normal              | normal                           | normal          | decreased or absent       |
| <i>Tg(GBT-B4)fcc337-P2</i>           | n.d.               | n.d.              | n.d.                | normal                           | normal          | decreased or absent on d4 |
| <i>vps35<sup>fcc403Gt</sup></i>      | normal             | normal            | normal              | n.d., edema on day 6             | n.d.            | n.d.                      |
| <i>eps15L1<sup>fcc436-P1Gt</sup></i> | normal             | normal            | normal              | normal                           | normal          | decreased                 |
| <i>Tg(GBT-B4)fcc510</i>              | normal             | normal            | n.d.                | normal                           | n.d.            | normal                    |
| <i>Tg(GBT-B4)fcc522</i>              | n.d.               | normal            | normal              | normal                           | normal          | normal                    |
| <i>abi1a<sup>fcc667Gt</sup></i>      | normal             | normal            | n.d.                | normal                           | n.d.            | normal                    |
| <i>Tg(GBT-B4)fcc688</i>              | normal             | normal            | normal              | n.d.                             | n.d.            | n.d.                      |

\*GBT-B4 = *Gt(LOXP-GAL4-VP16-FRT, syUAS:EGFP-FRT-LOXP)*
